# Supplementary material for: Development of a framework and research impact capture tool for nursing, midwifery, allied health professions, healthcare science, pharmacy and psychology (NMAHPPs)
Source: Springer Nature journal article supplement (doi:10.1186/s12913-023-09451-2), 2023-05-03
Supplement: MOESM1 [file 25314576]

## Appendix 1: List of UK Allied Health Professions

Art therapists

Dieticians

Drama therapists

Music therapists

Occupational therapists

Operating department practitioners

Orthoptists

Osteopaths

Paramedics

Physiotherapists

Podiatrists / chiropodists

Prosthetists and orthotists

Radiographers

Speech and language therapists

Source: NHS England 'The 14 allied health professions' <https://www.england.nhs.uk/ahp/role/>.  
Accessed 13/12/2022
